# Supplementary material for: Phosphorus-arsenic interaction mitigates toxicity and accumulation of arsenic in rice grown in contaminated fields
Source: Research Square preprint supplement (doi:10.21203/rs.3.rs-8891770/v1), 2026-02-23
Supplement: Supplementary file 2 [file 92520b423843f91b7e079a85.docx]

**Highlights**

This study depicts the effect of varied P fertilizer levels on rice plant.

Two contrasting rice varieties (SK and DS) differing in phosphorus-use efficiency were used.

DS showed pronounced decrease in As accumulation at high P doses.

Rice yield increased under high P doses by 14–23% for SK and 17–20% for DS.
